# Supplementary material
Source: publisher figshare collection journal article supplement (https://acs.figshare.com/ndownloader/files/3804379)
Supplement: Supplementary file 1 [file 3804379]

# Supporting Information

## Nitrogen-doped Metal-free Activated Carbon Catalysts for Aerobic Oxidation of Alcohols

Hiroyuki Watanabe, Sayaka Asano, Shin-ichiro Fujita, Hiroshi Yoshida, Masahiko Arai\*

Division of Chemical Process Engineering, Faculty of Engineering, Hokkaido University,  
Sapporo 060-8628, Japan

\* E-mail [marai@eng.hokudai.ac.jp](mailto:marai@eng.hokudai.ac.jp)

### Table of Contents

XPS spectra for nitrogen-doped AC materials of #4 - #13 given in Table 1 ----- page 2

Plot of the conversion in aerobic oxidation of benzyl alcohol against the amount  
of oxygen species for various AC-based catalyst samples of #1 - #13 of Table 1 ----- page 3

XRD patterns of selected nitrogen-doped and undoped AC materials of samples  
of 1, 3, 4, 8, and 11 of Table 1 ----- page 3

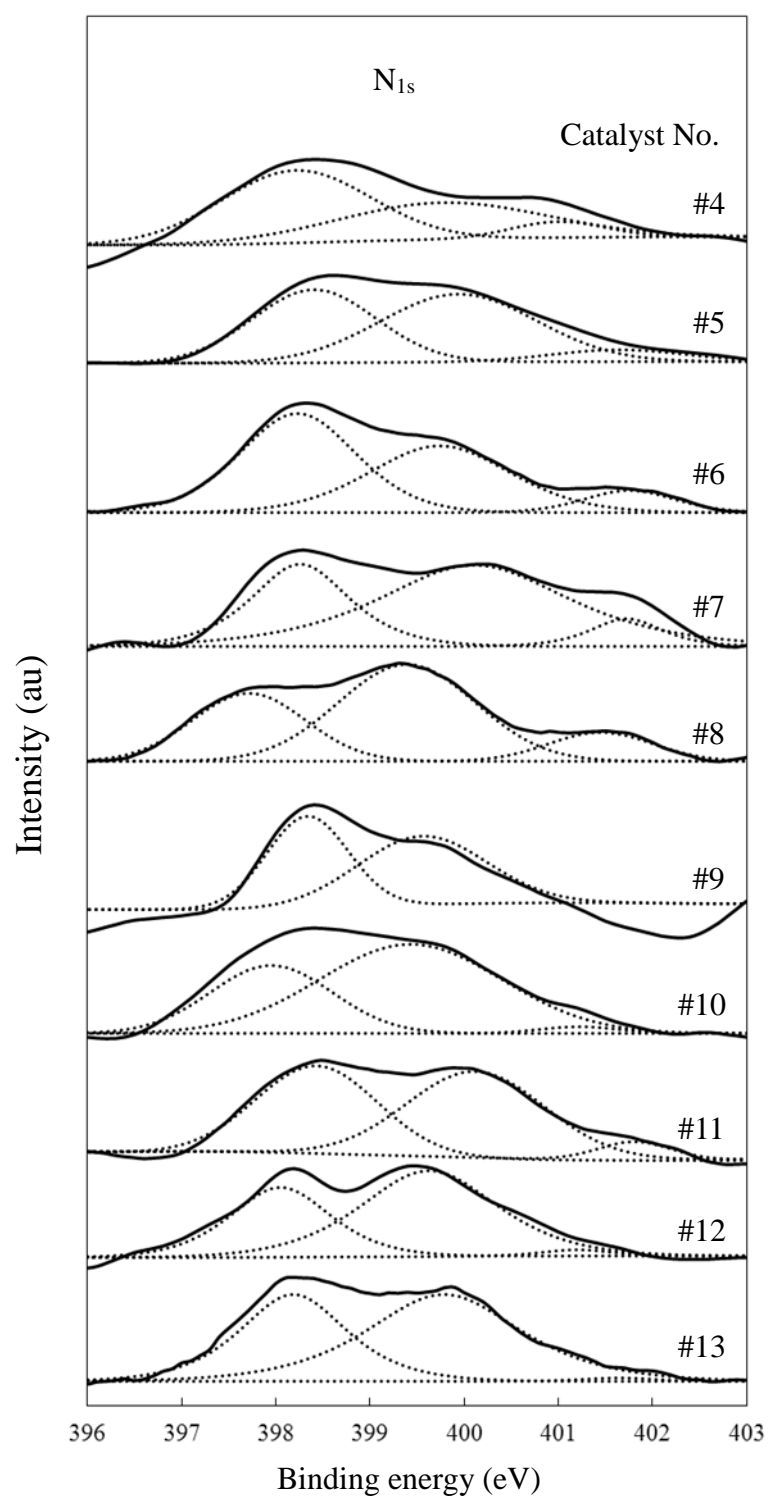

**Figure S1.** XPS spectra for nitrogen-doped AC materials of #4 - #13 given in Table 1

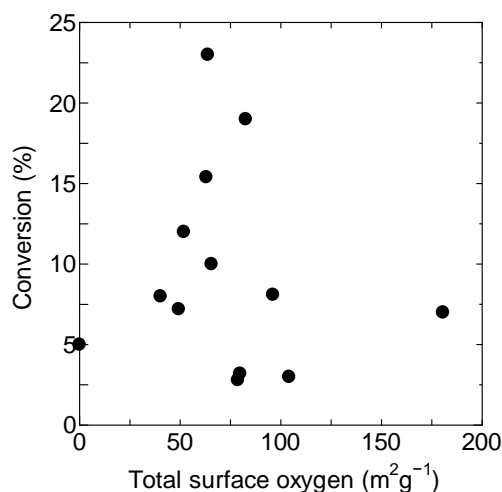

**Figure S2.** Plot of the conversion in aerobic oxidation of benzyl alcohol against the amount of oxygen species for various AC-based catalyst samples of #1 - #13 of Table 1. The amount of oxygen species in a sample was determined by the product of the surface concentration (mole fraction) of oxygen species measured by XPS and the BET surface area of the sample ( $\text{m}^2 \text{g}^{-1}$ ). Reaction conditions: substrate 1.1 mmol, catalyst 100 mg, solvent (ethanol) 5  $\text{cm}^3$ , temperature 120°C, time 5 h.

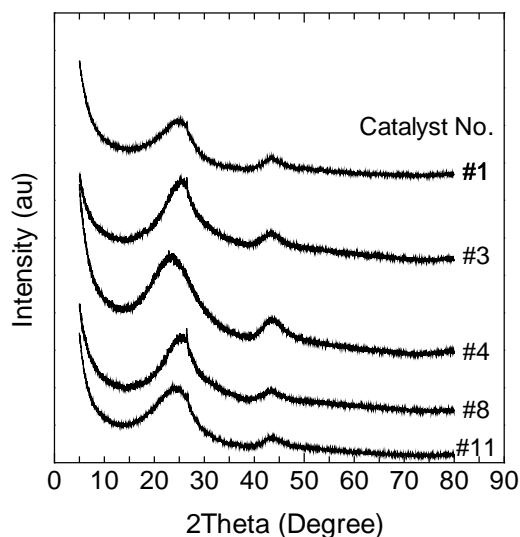

**Figure S3.** XRD patterns of selected nitrogen-doped and undoped AC materials of samples of 1, 3, 4, 8, and 11 of Table 1. XRD measurements were made using RIGAKU RINT2200 ULTRA IV with Ni-filtered  $\text{CuK}\alpha$  radiation. Other conditions: scan speed, 20  $^\circ/\text{min}$ , voltage 40 mV, current 20 mA.
